# Supplementary material for: Enrichment of in vivo transcription data from dietary intervention studies with in vitro data provides improved insight into gene regulation mechanisms in the intestinal mucosa
Source: Genes Nutr. 2017 Apr 13;12:11. doi: 10.1186/s12263-017-0559-1 (PMC5390468; doi:10.1186/s12263-017-0559-1)
Supplement: Supplementary file 3 — Table S3. Full names of overlapping DEGs expressed in vivo and in vitro ZnO, rye and amoxicillin interventions. (XLSX 12 kb) [file 12263_2017_559_MOESM3_ESM.xlsx]

## Sheet: Table-S3
		Additional file 3: Table S3. Full names overlapping DEG's expressed in vivo and in vitro ZnO, rye, and Amoxicillin interventions
		Gene symbol	full name	day in vivo / hours in vitroIPEC-J2	function / part of process
			ZnO
		HLADQA1	major histocompatibility complex, class II, DQ alpha 1	23d / 2h	antigen presentation from extracellular proteins / cell adhesion
		ZFP36L2	ZFP36 ring finger protein-like 2 (alias Butyrate Response Factor 2)	23d / 2h	promotion mRNAs deadenylation and degradation
		FA2H	fatty acid 2-hydroxylase	23d/ 6h	synthesis of 2-hydroxysphingolipids
		DMBT1	deleted in malignant brain tumors 1	23d-Ileum / 6h	mucosal and cellular immune defense/epithelial differentiation/Surfactant Protein D receptor
		PPP1R3C	protein phosphatase 1, regulatory subunit 3C	23d-Ileum / 6h	reppresor of glycogen breakdown / activator of glycogen synthes
		ACTR5	ARP5 actin-related protein 5 homolog (yeast)	35d-Jej / 6h	DNA replication / DNA double-strand break repair
		SLC2A6	solute carrier family 2 (facilitated glucose transporter), member 6	35d-Jej / 6h	transmembrane glucose transporter
		FOS	FBJ murine osteosarcoma viral oncogene homolog	23d-Jej / 2h and 6h	part of AP-1 transcription process
		MT1AE	metallothionein 1A	23d and 35d-Ileum-23d-Jej / 2h and 6h	Divalent metal ion transporter and scavenger of oxygfen radicals
			Rye
		LYSMD3	LysM Domain Containing 3	5%-21d, 10%-21d, 10% vs.5% 28d, 10% 28d / 2h	Putative Peptidoglycan-Binding
		HOOK3	Hook Microtubule-Tethering Protein 3	10%-21d, 10% vs.5% 28d, 10% 28d / 2h	component FTS/Hook/FHIP complex / vesicle trafficking
		PTEN	Phosphatase And Tensin Homolog	10%-21d, 10% vs.5% 28d, 10% 28d / 2h	protein tyrosine phosphatases / negatively regulating AKT-PKB signaling
		ZFYVE16	Zinc Finger, FYVE Domain Containing 16	10%-21d, 10% vs.5% 28d / 2h	recruits TGF-transcriptional modulators / membrane trafficking endosomes
		CCK	Cholecystokinin	10%-21d, 10% vs.5% 28d / 2h	peptide hormone induces release of pancreatic enzymes
		ACSL3	Acyl-CoA Synthetase Long-Chain Family Member 3	10%-21d, 10%-28d / 2h	long-chain fatty acids synthetase / degradation via beta-oxidation
		SGTB	Small Glutamine-Rich Tetratricopeptide Repeat-Containing, Beta	10%-21d, 10%-28d / 2h	heatschock protein (HSP) chaperone / regulates ATPase activity HSP70
		CSAD	Cysteine Sulfinic Acid Decarboxylase	10%-21d / 2h	catalyzing the decarboxylation of cysteinesulfinate to hypotaurine
		TIMP2	TIMP Metallopeptidase Inhibitor 2	10%-21d / 2h	inhibitor of matrix metalloproteinases / maintenance of tissue homeostasis
		TMTC3	Transmembrane And Tetratricopeptide Repeat Containing 3	10%-21d / 2h	heatschock protein interaction
		RARA	Retinoic Acid Receptor, Alpha	5%-21d / 2h	nuclear retinoic acid receptor / Interacts with Cyclin dependent kinase 7
		REV3L	REV3-Like, Polymerase (DNA Directed), Zeta, Catalytic Subunit	5%-21d / 2h	Polymerase (DNA Directed)
		RPL19	Ribosomal Protein L19	5%-21d / 2h	ribosomal protein component of the 60S subunit.
		RPL5	Ribosomal Protein L5	5%-21d / 2h	ribosomal protein component of the 60S subunit.
		BRD1	Bromodomain Containing 1	10% vs.5%-28d / 2h	component MOZ/MORF complex / stimulates acetylation of histones H3,H4
		CPSF6	Cleavage And Polyadenylation Specific Factor 6, 68kDa	10%-28d / 2h	pre-MRNA 3-end poly(A) site cleavage and poly(A) addition
		EIF2AK2	Eukaryotic Translation Initiation Factor 2-Alpha Kinase 2	10%-28d / 2h	Eukaryotic Translation Initiation IFN-induced / phosphorylates CDK1
		IFIT5	Interferon-Induced Protein With Tetratricopeptide Repeats 5	10%-28d / 2h	Interferon-induced RNA-binding protein / senmsor viral RNA
		TPBG	Trophoblast Glycoprotein	5%-28d / 2h	inhibitor of Wnt/beta-catenin signaling
		FUBP1	Far Upstream Element (FUSE) Binding Protein 1	10%-21d / 6h	binds to the c-myc far upstream element / regulation of c-myc in undifferentiated cells
		NOGE	Noggin	5%-21d / 2h	inactivates members of TGF-beta family signaling proteins, (e.g BMPs)
		MUC17	Mucin's, Cell Surface Associated	5%-21d, 10% vs.5% 21d / 6h	membrane-bound mucin that provides protection to gut epithelial cells
		MUC4E	Mucin's, Cell Surface Associated	2 and 6h	sialomucin involved in intestinal epithelial cell differentiation
		MUC13E	Mucin's, Cell Surface Associated	2 and 6h	epithelial and hemopoietic transmembrane mucin with role in cell signaling.
			Amoxicillin
		OSER1	oxidative stress responsive serine-rich 1	5 / 2h	cellular response to hydrogen peroxide / UBC binding
		ZBTB17	zinc finger and BTB domain containing 17	5 / 6h	c-MYC transcriptional repression (regulation of cell cyle
		MID1IP1	MID1 interacting protein 1	5 / 6h	negative regulation of microtubule depolymerization / UBC binding
		Eidentified as possible effector molecule expressed by enterocytes (see also Table 3 in the body of the article).
